# Supplementary material
Source: publisher figshare collection journal article supplement (https://sage.figshare.com/ndownloader/files/17497016)
Supplement: Supplementary file 1 [file 17497016]

Reviewer 2 v.1

Comments to the author:

We thank the authors for the article entitled "Single application of airway stents in thoracogastric-airway fistula : results and prognostic factors for its healing."

The authors presented a retrospective study to study the effectiveness of airway stenting for TGAF patients and find related factors with healing of fistula.

The authors presented successful results and the complete sealing of fistula was found in 45 (77.6%) patients, this is an exciting result. A shorter post-esophagectomy duration may predict a better TGAF healing, this finding is also helpful for clinical practice.

This paper has a high contribution to medical literature, which may be of interest to readers. It can be published.

The study focus on metallic stent and silicon stent is quite interesting, however, some problems should be clarified first as below;

1. radiologic removal of these metallic stents and surgical removal of the silicon stents under general anesthesia with rigid bronchoscope have to clarify it .
2. Only one figure is not sufficient, figures of metallic stents, the place/ removal procedure, or complications of stents should be provided.
3. A total of 58 TGAF patients were studied. Healing was achieved in 20 (34.5%) patients and complete sealing in 45 (77.6%) patients. Why the total percent is not 100%, please justify it.
4. There are a lot of grammar and spelling errors in english. The english language should be revised.
